# Supplementary figures and images for: MHC-Dependent Mate Selection within 872 Spousal Pairs of European Ancestry from the Health and Retirement Study
Source: MDPI journal article supplement (doi:10.3390/genes9010053), 2018-01-22

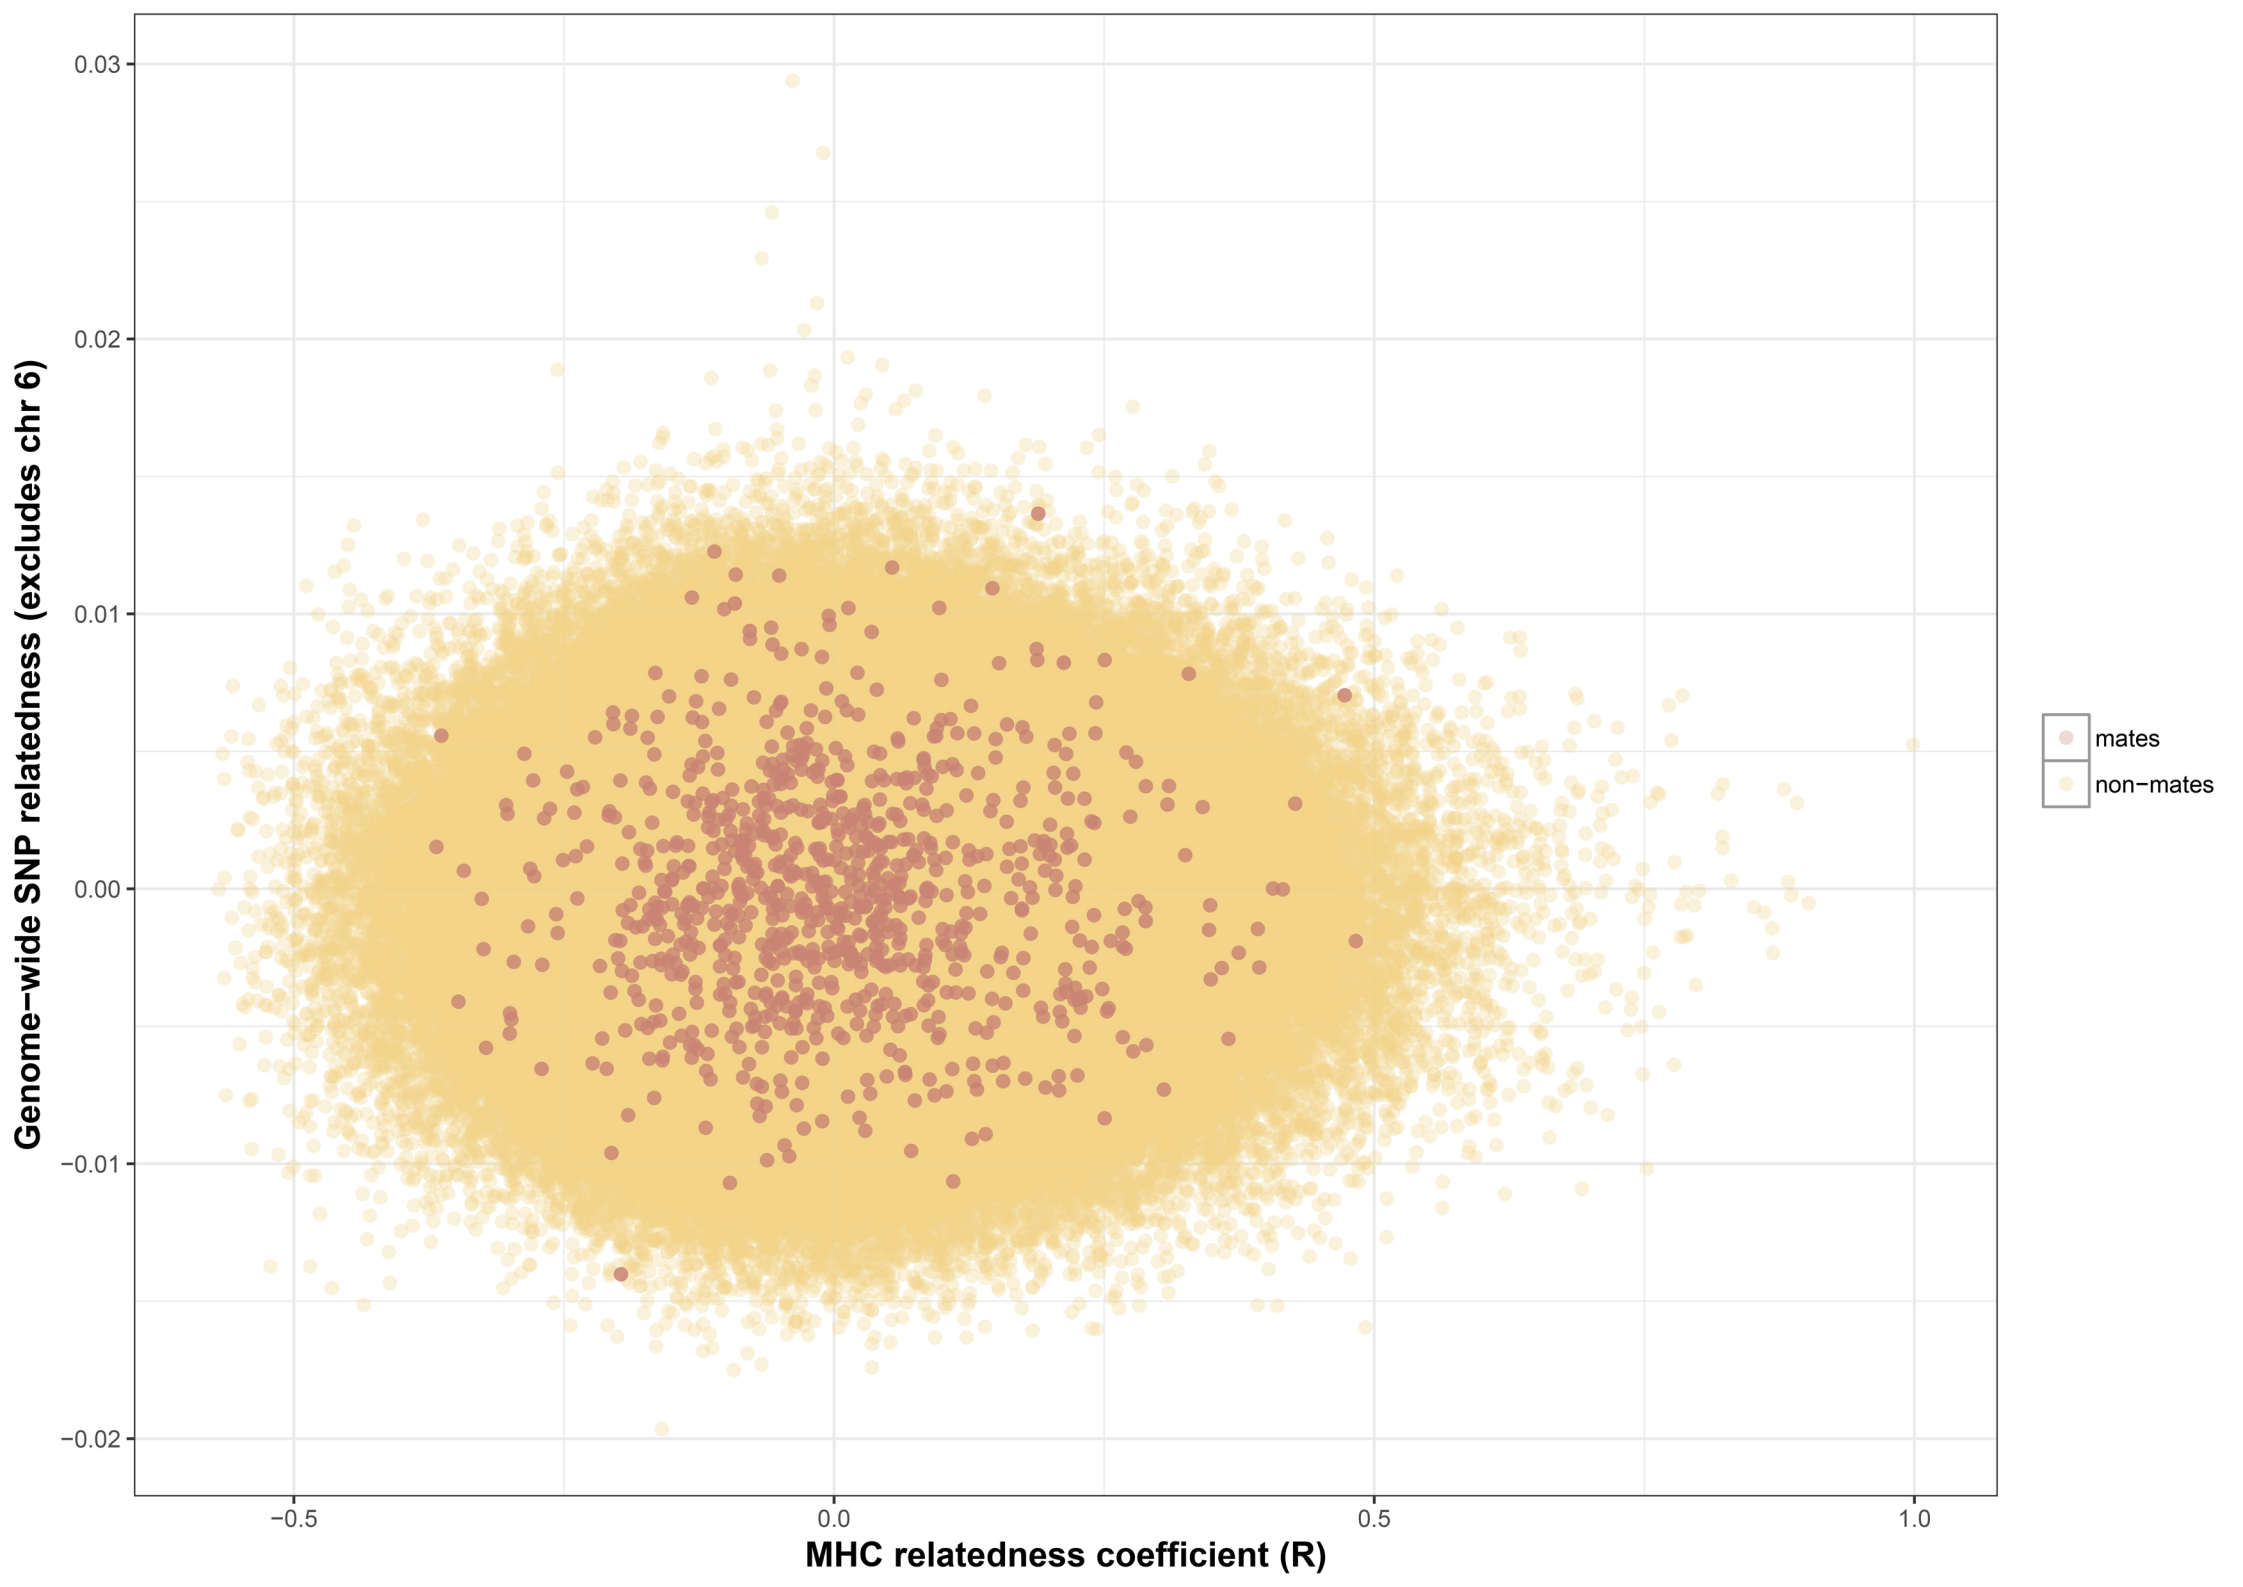

Supplement: s1 [file s1]

**A**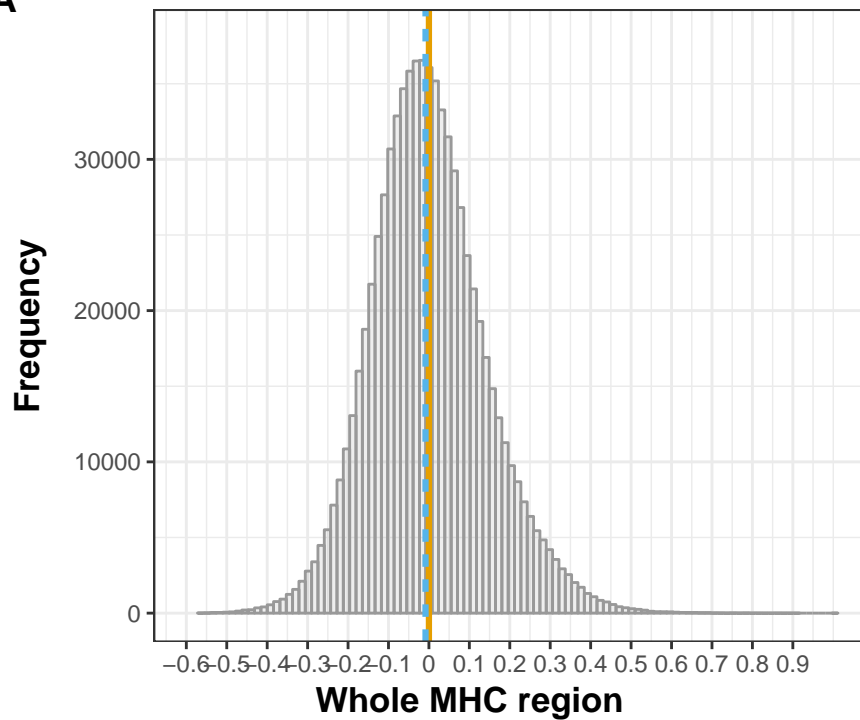**B**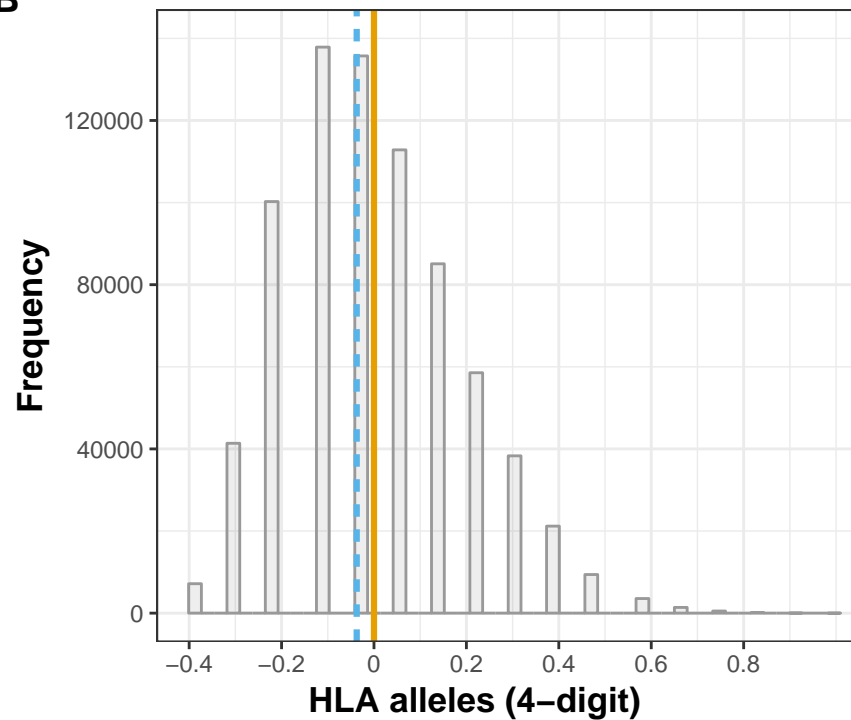**C**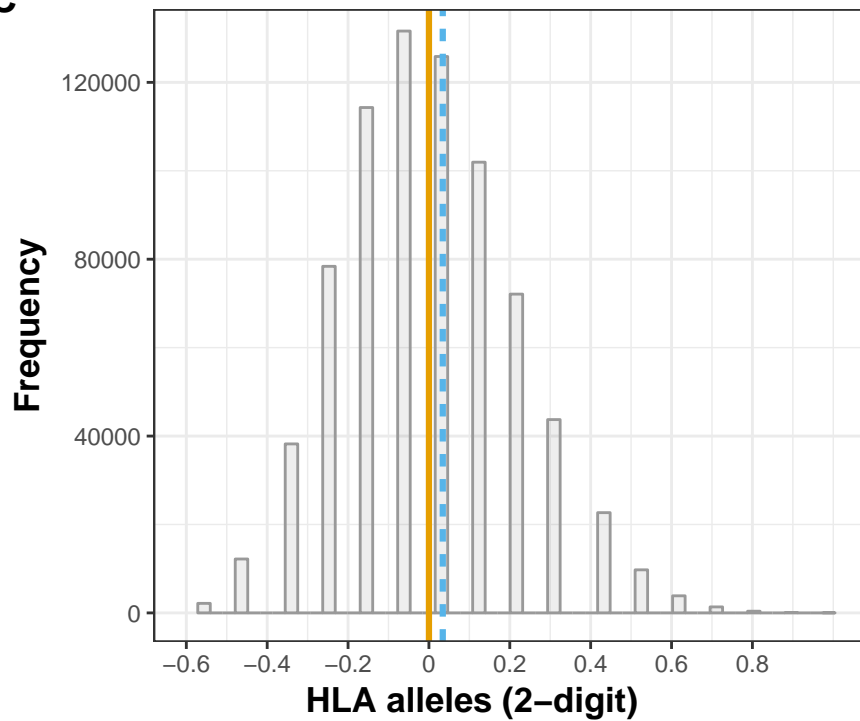**D**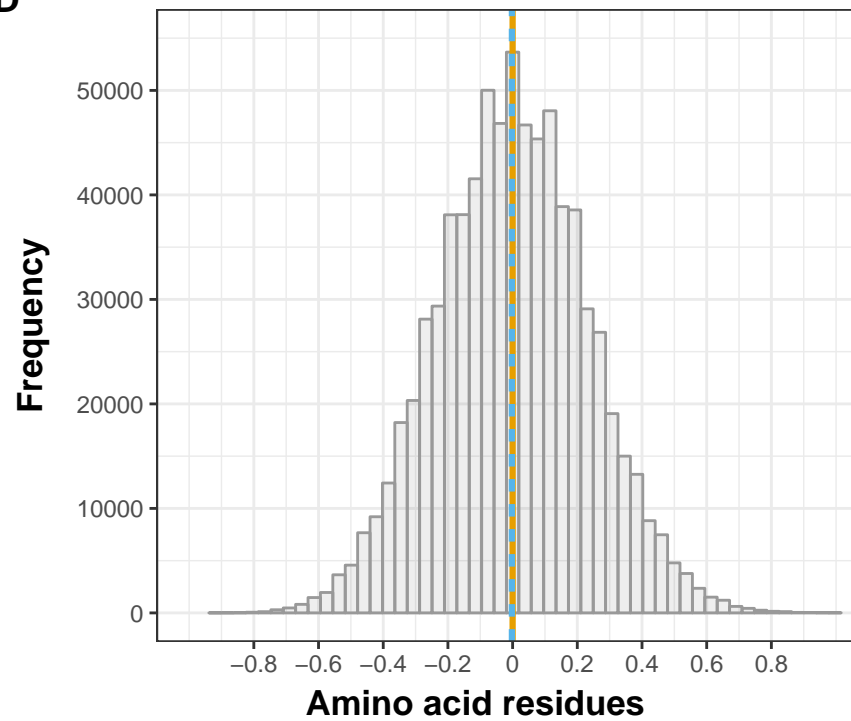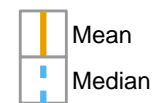

Supplement: s1 [file s1]

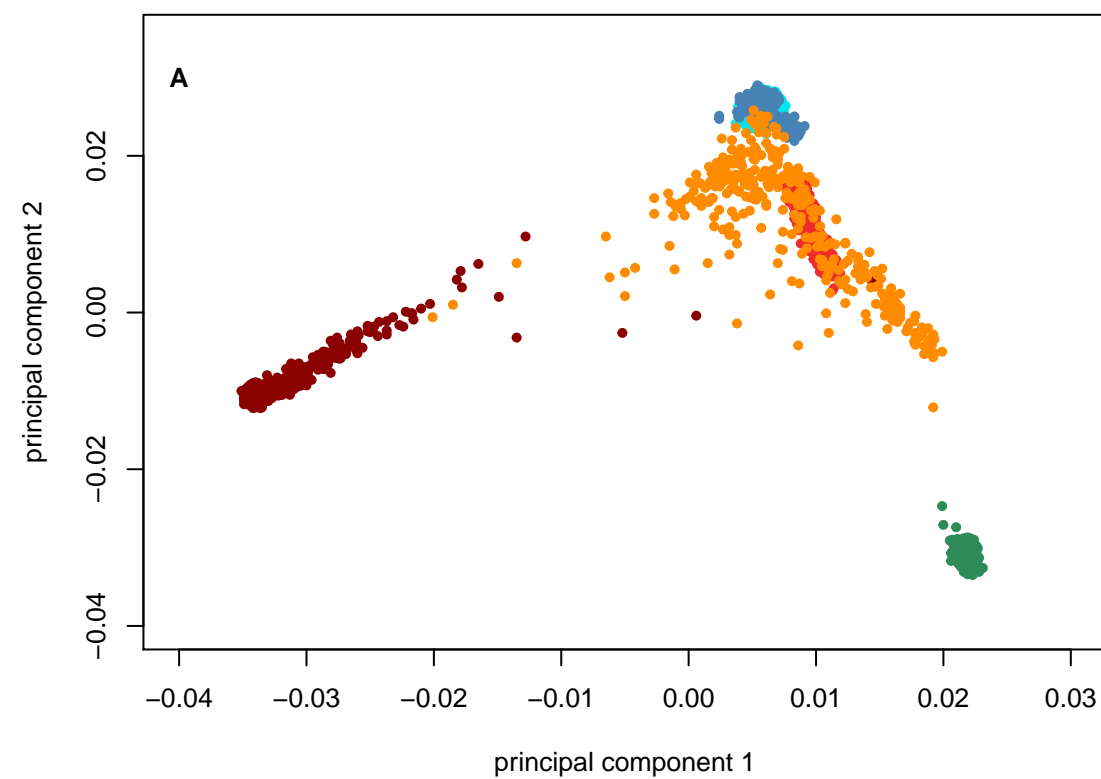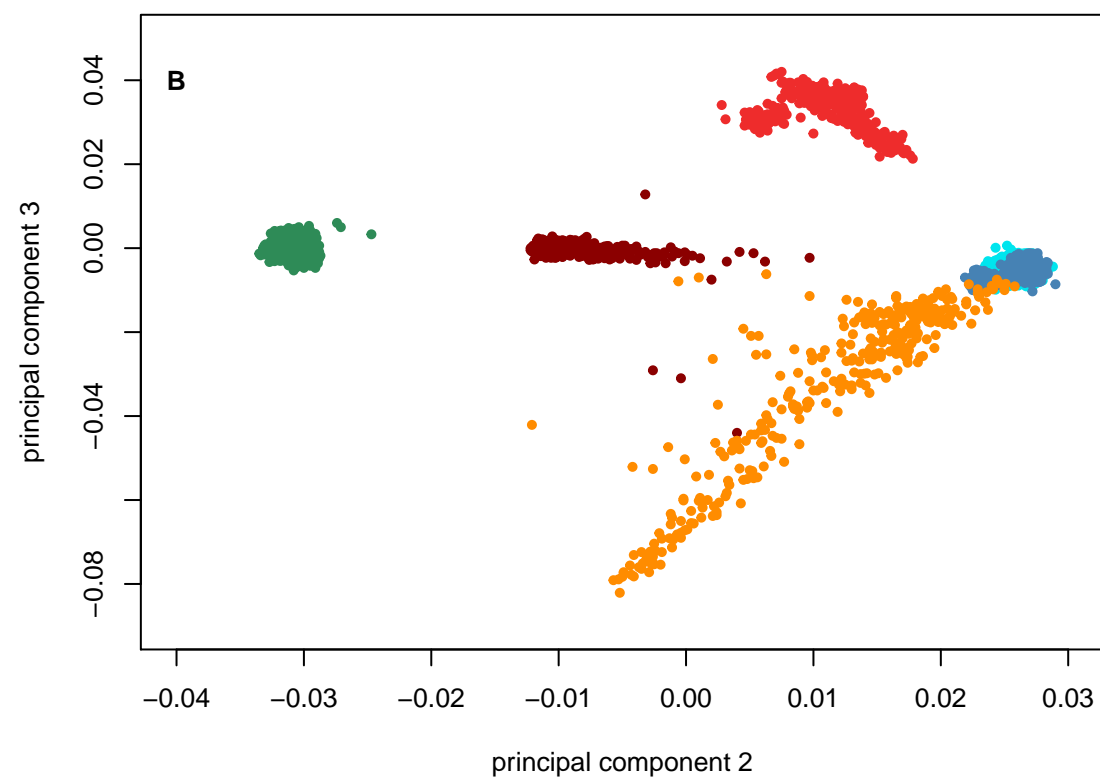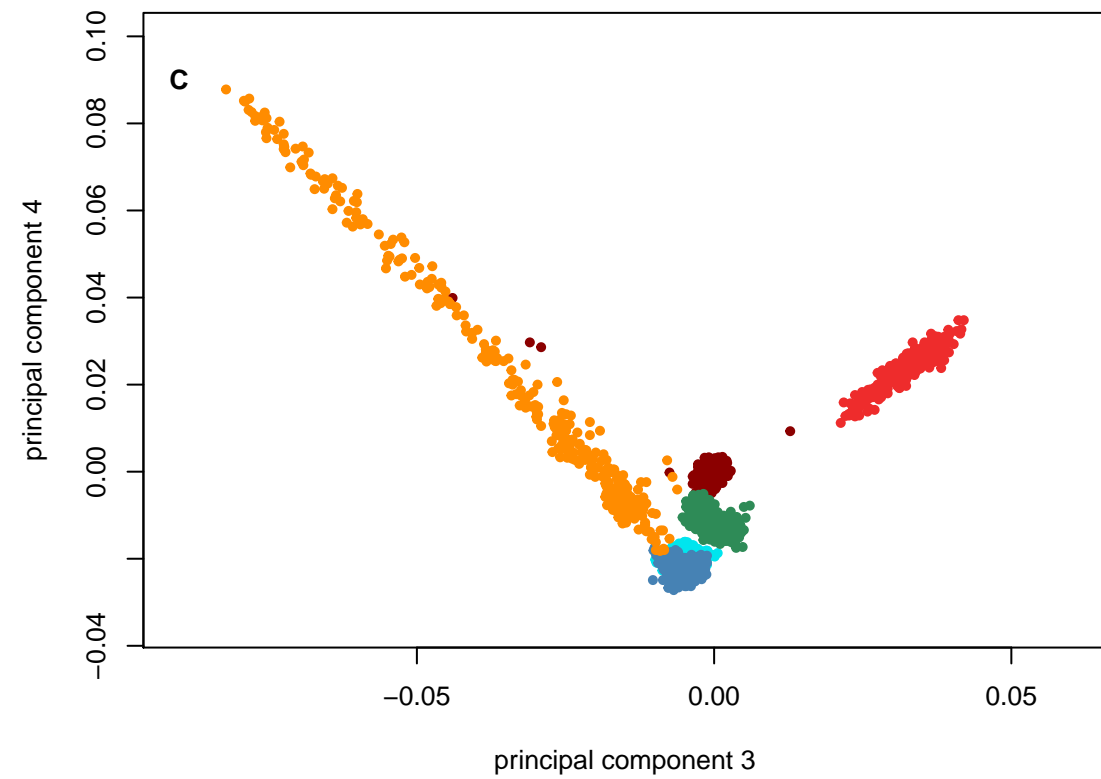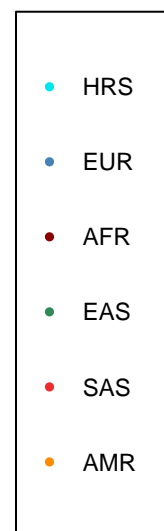

Supplement: s1 [file s1]
